# Supplementary material for: IL-2Rα up-regulation is mediated by latent membrane protein 1 and promotes lymphomagenesis and chemotherapy resistance in natural killer/T-cell lymphoma
Source: PubMed Central journal article supplement (PMC6235395; doi:10.1186/s40880-018-0334-8), 2018-10-19
Supplement: 40880_2018_334_MOESM1_ESM.pdf [file 40880_2018_334_MOESM1_ESM.pdf]

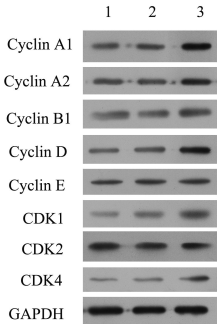

1. Control

2. Negative control

3. IL-2R $\alpha$  overexpression
